# Supplementary material for: Pentaborate(1−) salts templated by substituted pyrrolidinium cations: synthesis, structural characterization, and modelling of solid-state H-bond interactions by DFT calculations
Source: Royal Society of Chemistry journal article supplement (doi:10.1039/c5dt00248f), 2015-01-01
Supplement: c5dt00248f5.pdf [file c5dt00248f5.pdf]

## SUPPLEMENTARY DATA

**Table 1.** The relative energies, vibrational frequencies and bond lengths of  $[\text{B}_5\text{O}_6(\text{OH})_4]^-$  monomer when modelled at B3LYP/6-311++G(*d,p*) in the gas phase. Relative energies and vibrational frequencies are quoted to the nearest whole number.

| Conformer <sup>a</sup> | Point Group     | Relative Energy (kJ mol <sup>-1</sup> ) | Lowest Vibrational Frequency (cm <sup>-1</sup> ) | $\nu_{\text{OH}}$ (cm <sup>-1</sup> ) | Bond Length $r_{\text{OH}}$ (Å)          |
|------------------------|-----------------|-----------------------------------------|--------------------------------------------------|---------------------------------------|------------------------------------------|
| <i>iii</i>             | D <sub>2d</sub> | 0                                       | 37                                               | 3869-3870                             | 0.962                                    |
| <i>iiio</i>            | C <sub>1</sub>  | 4                                       | 35                                               | 3868-3873                             | 0.962 ( <i>i</i> )<br>0.961 ( <i>o</i> ) |
| <i>oiiio</i>           | C <sub>2</sub>  | 8                                       | 35                                               | 3868-3873                             | 0.962 ( <i>i</i> )<br>0.961 ( <i>o</i> ) |
| <i>ooii</i>            | C <sub>2v</sub> | 11                                      | 33                                               | 3870-3878                             | 0.962 ( <i>i</i> )<br>0.961 ( <i>o</i> ) |
| <i>ooooi</i>           | C <sub>1</sub>  | 15                                      | 33                                               | 3868-3878                             | 0.962 ( <i>i</i> )<br>0.961 ( <i>o</i> ) |
| <i>ooooo</i>           | D <sub>2d</sub> | 22                                      | 33                                               | 3877-3878                             | 0.961                                    |

<sup>a</sup> *i* and *o* relate to the position of the OH groups, where *i* denotes the OH pointing in, towards the tetrahedral B centre, and *o* denotes the OH group pointing out, away from the tetrahedral B centre.

**Table 2.** The relative energies, vibrational frequencies and bond lengths of  $[\text{B}_5\text{O}_6(\text{OH})_4]^-$  monomer when modelled at B3LYP/6-311++G(*d,p*) using a PCM implicit solvent model. Relative energies and vibrational frequencies are quoted to the nearest whole number.

| Conformer <sup>a</sup> | Point Group     | Relative Energy (kJ mol <sup>-1</sup> ) | Lowest Vibrational Frequency (cm <sup>-1</sup> ) | $\nu_{\text{OH}}$ (cm <sup>-1</sup> ) | Bond Length $r_{\text{OH}}$ (Å) |
|------------------------|-----------------|-----------------------------------------|--------------------------------------------------|---------------------------------------|---------------------------------|
| <i>iii</i>             | D <sub>2d</sub> | 0                                       | 33                                               | 3853                                  | 0.963                           |
| <i>iiio</i>            | C <sub>1</sub>  | 1                                       | 32                                               | 3852-3854                             | 0.963                           |
| <i>oiiio</i>           | C <sub>2</sub>  | 2                                       | 33                                               | 3853-3854                             | 0.963                           |
| <i>ooii</i>            | C <sub>2v</sub> | 2                                       | 32                                               | 3853-3855                             | 0.963                           |
| <i>ooooi</i>           | C <sub>1</sub>  | 3                                       | 31                                               | 3853-3855                             | 0.963                           |
| <i>ooooo</i>           | D <sub>2d</sub> | 5                                       | 31                                               | 3854-3855                             | 0.963                           |

<sup>a</sup> *i* and *o* relate to the position of the OH groups, where *i* denotes the OH pointing in, towards the tetrahedral B centre, and *o* denotes the OH group pointing out, away from the tetrahedral B centre.

**Table 3.** The binding energies of  $[\text{B}_5\text{O}_6(\text{OH})_4\text{H}]_n$  polymers ( $n = 2, 3$ ) when modelled at B3LYP/6-311++G( $d,p$ ) using neutral pentaborate monomers (formed by protonating the  $\gamma$  O atom distal to the H-bonding). Binding energies are quoted to the nearest whole number.

| Species                                              | Point Group | Energy of monomer<br>( $\times 10^3$ kJ mol $^{-1}$ ) | Absolute Energy of polymer<br>( $\times 10^3$ kJ mol $^{-1}$ ) | Binding Energy<br>(kJ mol $^{-1}$ ) | Energy per H-bond<br>(kJ mol $^{-1}$ ) |
|------------------------------------------------------|-------------|-------------------------------------------------------|----------------------------------------------------------------|-------------------------------------|----------------------------------------|
| $[\text{B}_5\text{O}_6(\text{OH})_4\text{H}]_{iii}$  | $C_{2v}$    | -2311.9153                                            | -4623.8365                                                     | 0                                   | 0                                      |
| $[\text{B}_5\text{O}_6(\text{OH})_4\text{H}]_{iiiO}$ | $C_1$       | -2311.9183                                            | -4623.8305                                                     | 0                                   | 0                                      |
| $\text{R}_2^2(8) \alpha^a$                           | $C_{2h}$    | -2311.9153                                            | -4623.9065                                                     | -76                                 | -32                                    |
| $\text{R}_2^2(8) \alpha^b$                           | $C_{2v}$    | -2311.9153                                            | -6935.8843                                                     | -139                                | -32                                    |
| $\text{R}_2^2(12) \beta^c$                           | $C_{2h}$    | -2311.9183                                            | -4623.8669                                                     | -30                                 | -15                                    |
| $\text{C}(8) \beta$                                  | $C_1$       | 1) -2311.9153<br>2) -2311.9183                        | -4623.8457                                                     | -12                                 | -12                                    |
| $\text{R}_2^2(8) \gamma$                             | $C_{2h}$    | -2311.9183                                            | -4623.8713                                                     | -34                                 | -17                                    |

<sup>a</sup>This dimer was found to contain two additional O---O interactions (3.092 Å) between the protonated O atom of one monomer to the O atom within the  $\text{R}_2^2(8)$  ring of the other monomer. <sup>b</sup> This molecule is a trimer which was found to have no bending of the boroxole rings on the central pentaborate unit and comprised of 4 H-bond and 2 O---O interactions. This energy of the O---O interaction (-7 kJ mol $^{-1}$ ) was evaluated from a series of simultaneous linear equations. <sup>c</sup> This dimer was found to contain an additional interaction between the two central O atoms (3.008 Å) within the 12-membered ring, however it's energy could not be calculated.

**Table 4.** The binding energies, dimerization type and bond lengths of  $[\text{B}_5\text{O}_6(\text{OH})_4]_2^{2-}$  dimers when modelled at B3LYP/6-311++G( $d,p$ ) using a PCM implicit solvent model. Binding energies are quoted to the nearest whole number.

| Dimerization reciprocal position | Point Group | Dimerization type  | Number of H-bonds | Binding Energy (kJ mol $^{-1}$ ) | Interatomic distance (Å)       |                                 |
|----------------------------------|-------------|--------------------|-------------------|----------------------------------|--------------------------------|---------------------------------|
|                                  |             |                    |                   |                                  | $r_{\text{O} \cdots \text{H}}$ | $r_{\text{OH} \cdots \text{O}}$ |
| $\alpha$                         | $C_i$       | $\text{R}_2^2(8)$  | 2                 | -21                              | 1.773                          | 2.755                           |
| $\beta$                          | $C_1$       | $\text{R}_2^2(12)$ | 2                 | -10                              | 1.973                          | 2.941 <sup>a</sup>              |
| $\beta$                          | $C_1$       | $\text{C}(8)$      | 1                 | -16                              | 1.846                          | 2.814                           |
| $\gamma$                         | $C_{2h}$    | $\text{R}_2^2(8)$  | 2                 | -16                              | 1.849                          | 2.825                           |

<sup>a</sup> This dimer was found to contain an additional interaction between the two central O atoms (3.043 Å) within the 12-membered ring.

**Table 5.** The frequencies and bond lengths of the OH bonds of  $[\text{B}_5\text{O}_6(\text{OH})_4]^{2-}$  dimers when modelled at B3LYP/6-311++G(*d,p*) using a PCM implicit solvent model. Frequencies are quoted to the nearest whole number.

| Reciprocal dimer              | Interacting Bond Length $r_{\text{OH}}$ (Å) | Non-interacting Bond Length $r_{\text{OH}}$ (Å) | Lowest Vibrational Frequency ( $\text{cm}^{-1}$ ) | Number of interacting OH | $\nu_{\text{OH}}$ (interacting) ( $\text{cm}^{-1}$ ) | $\nu_{\text{OH}}$ (non-interacting) ( $\text{cm}^{-1}$ ) |
|-------------------------------|---------------------------------------------|-------------------------------------------------|---------------------------------------------------|--------------------------|------------------------------------------------------|----------------------------------------------------------|
| $\alpha$ $\text{R}_2^{2-}(8)$ | 0.983                                       | 0.963                                           | 11                                                | 2                        | 3422-3451                                            | 3851-3854                                                |
| $\beta$ $\text{R}_2^{2-}(12)$ | 0.974                                       | 0.963                                           | 8                                                 | 2                        | 3635-3638                                            | 3851-3853                                                |
| $\beta$ C(8)                  | 0.975                                       | a) 0.963<br>b) 0.964 <sup>a</sup>               | 4                                                 | 1                        | a) 3596<br>b) 3589 <sup>a</sup>                      | 3852-3853                                                |
| $\gamma$ $\text{R}_2^{2-}(8)$ | 0.976                                       | 0.963                                           | 7                                                 | 2                        | 3563-3581                                            | 3853-3854                                                |

<sup>a</sup> Proton accepting OH

**Table 6.** The geometries of the dimerization motifs of  $[\text{B}_5\text{O}_6(\text{OH})_4]^{2-}$  dimers when modelled at B3LYP/6-311++G(*d,p*) using a PCM implicit solvent model.

| Reciprocal dimer                         | Interatomic distance $r_{\text{O} \cdots \text{H}}$ (Å) | $\text{OH}^{\text{b}} \cdots \text{O}^{\text{c}}$ angle ( $^{\circ}$ ) | $\text{BOH}^{\text{b}}$ angle ( $^{\circ}$ ) | $\text{BO}^{\text{c}} \cdots \text{H}^{\text{b}}$ angle ( $^{\circ}$ ) |
|------------------------------------------|---------------------------------------------------------|------------------------------------------------------------------------|----------------------------------------------|------------------------------------------------------------------------|
| $\alpha$ $\text{R}_2^{2-}(8)$            | 1.773                                                   | 178.14                                                                 | 113.92                                       | 121.70                                                                 |
| $\beta$ $\text{R}_2^{2-}(12)$            | 1.973                                                   | 171.83                                                                 | 113.05                                       | 125.23                                                                 |
| $\beta^{\text{a}}$ $\text{R}_2^{2-}(12)$ | 1.973                                                   | 172.93                                                                 | 113.00                                       | 124.86                                                                 |
| $\beta$ C(8)                             | 1.846                                                   | 171.52                                                                 | 114.27                                       | 128.96                                                                 |
| $\gamma$ $\text{R}_2^{2-}(8)$            | 1.849                                                   | 178.08                                                                 | 114.57                                       | 124.61                                                                 |

<sup>a</sup> The  $\beta$   $\text{R}_2^{2-}(12)$  dimer was found to be asymmetric, <sup>b</sup> donor atom, <sup>c</sup> acceptor atom.

**Table 7.** A summary of the electron density and bond character of  $[\text{B}_5\text{O}_6(\text{OH})_4]_2^{2-}$  dimers found in QTAIM analysis.

| Atomic Units (a.u.)          |       |            |               |               |               |                      |                        |                 |
|------------------------------|-------|------------|---------------|---------------|---------------|----------------------|------------------------|-----------------|
| Reciprocal dimer             | Bond  | $\rho_b^b$ | $\lambda_1^c$ | $\lambda_2^c$ | $\lambda_3^c$ | $\nabla^2(\rho_b)^d$ | Character <sup>e</sup> | $\varepsilon^f$ |
| $\alpha$ $\text{R}_2^2(8)$   | O-H*  | 0.336      | -1.683        | -1.673        | 1.013         | -2.342               | A                      | 0.006           |
|                              | O---H | 0.037      | -0.060        | -0.056        | 0.237         | 0.121                | B                      | 0.058           |
| $\beta$ $\text{R}_2^2(12)$   | O-H*  | 0.347      | -1.736        | -1.723        | 1.019         | -2.440               | A                      | 0.007           |
|                              | O---H | 0.022      | -0.030        | -0.028        | -0.140        | 0.082                | B                      | 0.087           |
|                              | O---O | 0.008      | -0.007        | -0.006        | -0.039        | 0.026                | B                      | 0.142           |
| $\beta^a$ $\text{R}_2^2(12)$ | O-H*  | 0.347      | -1.735        | -1.723        | 1.019         | -2.439               | A                      | 0.007           |
|                              | O---H | 0.022      | -0.030        | -0.028        | 0.140         | 0.082                | B                      | 0.085           |
| $\beta$ C(8)                 | O-H*  | 0.345      | -1.734        | -1.722        | 1.031         | -2.425               | A                      | 0.007           |
|                              | O---H | 0.030      | -0.045        | -0.042        | 0.196         | 0.109                | B                      | 0.059           |
| $\gamma$ $\text{R}_2^2(8)$   | O-H*  | 0.344      | -1.726        | -1.714        | 1.027         | -2.413               | A                      | 0.007           |
|                              | O---H | 0.030      | -0.046        | -0.043        | 0.195         | 0.106                | B                      | 0.066           |

<sup>a</sup> The  $\beta$   $\text{R}_2^2(12)$  dimer was found to be asymmetric but close to the idealized  $\text{C}_2$  symmetry, <sup>b</sup> Electron density at the BCP, <sup>c</sup> Eigenvalues of Hessian, <sup>d</sup> Laplacian of the electron density at the BCP, <sup>e</sup> A = covalent, highly polar, B = “closed-shell”, <sup>f</sup> Bond ellipticity, \* Atom involved in hydrogen bonding.

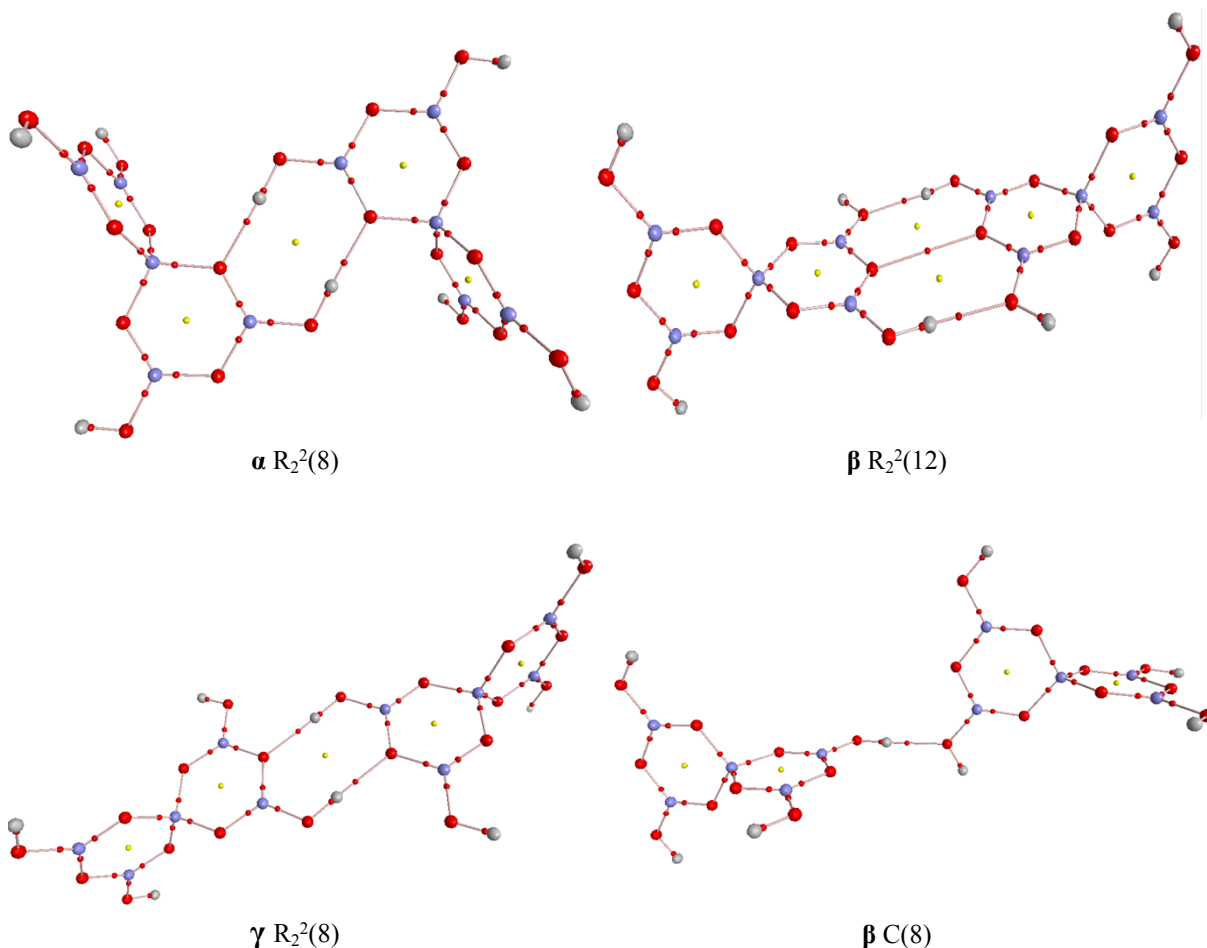

**Figure 1.** The four dimerization types of  $[\text{B}_5\text{O}_6(\text{OH})_6]_2^{2-}$  under QTAIM analysis. Any BCPs (small red balls), RCPs (small yellow balls) and bond paths are displayed. H---O and O---O interactions are indicated.
